# Supplementary material for: CO2 activation by copper oxide clusters: size, composition, and charge state dependence
Source: Royal Society of Chemistry journal article supplement (doi:10.1039/d4cp02651a), 2024-01-01
Supplement: d4cp02651a1.pdf [file d4cp02651a1.pdf]

Supporting information to

## CO<sub>2</sub> Activation by Copper Oxide Clusters: Size, Composition, and Charge State Dependence

Pavol Mikolaj, Barbara Zamora Yusti, László Nyulászi, Joost M. Bakker, Tibor Hölzl, Sandra M. Lang.

### S1 Intensity scaling of calculated spectra

We find that multiplying the intensities of the calculated spectra by the wavelength  $\lambda$  gives a better match between the calculated and experimental spectra, as shown in Figure S1. We speculate that the better match is caused by a wavelength dependent flux. Given that the intracavity laser's spatial mode is quite well-defined, we conclude that the frequency dependence of the photon flux is not due to a changing of the beam size but due to an increase in spectral brightness. The assumed Gaussian laser mode's cross-section is proportional to the wavelength  $\lambda$  and consequentially, because the macropulse energy is relatively constant over a scanned wavelength range, the fluence (energy per unit area) scales with  $1/\lambda$ , but the photon flux (photons per unit area) does not, because division by the photon energy ( $h\nu=hc/\lambda$ ) cancels the  $1/\lambda$  dependence. Instead, because the laser's spectral bandwidth is proportional to the wavenumber, the flux per unit wavenumber reduces with wavenumber. Therefore, the intensity of all spectra shown in the manuscript and the supporting information were scaled by we scaled by  $\lambda$ .

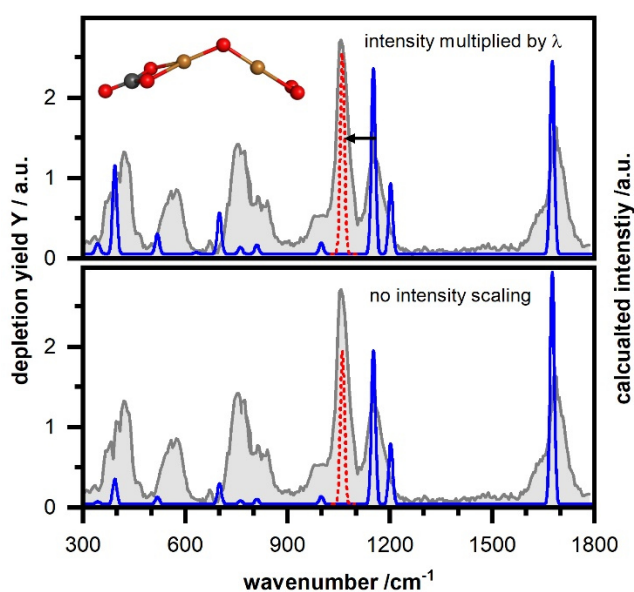

**Figure S1:** IR-MPD spectrum (gray) of  $\text{Cu}_2\text{O}_4(\text{CO}_2)^-$  together with the calculated infrared spectrum (blue) of isomer 2,4,1-a. In the upper panel the intensity of the calculated spectrum was scaled with the  $\lambda$ , while in the lower spectrum the intensity was not scaled.

## S2 Additional structures and vibrational spectra for $\text{Cu}_2\text{O}_4(\text{CO}_2)^-$

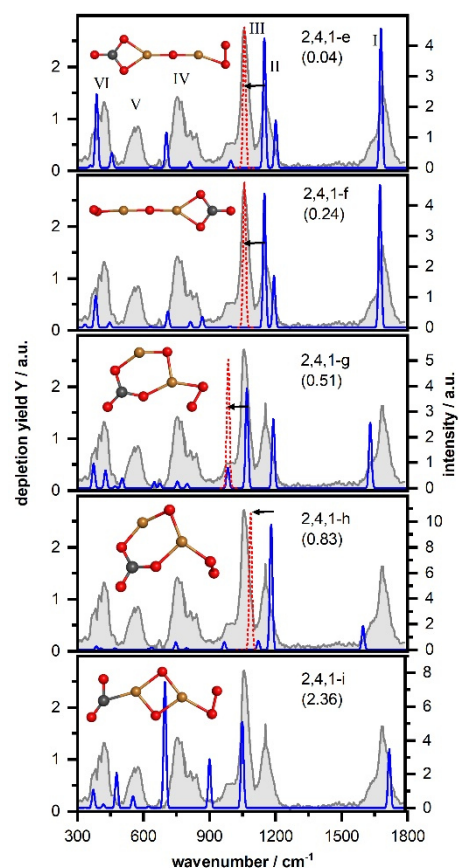

**Figure S2:** IR-MPD spectrum (in gray) of  $\text{Cu}_2\text{O}_4(\text{CO}_2)^-$  together with calculated vibrational spectra (in blue) of several isomeric structures (relative energies are given in brackets in eV). The experimental spectrum was measured in two independent runs ( $1800\text{--}660\text{ cm}^{-1}$  and  $800\text{--}240\text{ cm}^{-1}$ , while the first one was obtained at reduced FELICE fluence). To obtain an intensity match of the peaks in the overlapping spectral region the intensity of the  $800\text{--}240\text{ cm}^{-1}$  spectrum was multiplied by a factor 0.6. The intensities of the calculated spectrum were multiplied by the wavelength. The red dashed peak corresponds to the O-O stretching mode resulting from the scaling with a factor of 0.921. Isomers **2,4,1-e** and **2,4,1-f** are similar to isomer **2,4,1-a** shown in the main text and also exhibit similar vibrational spectra. Isomers **2,4,1-g** and **2,4,1-h** provide an inferior match with the IR-MPD spectra, in particular for band I. Cu, C, and O atoms are depicted as yellow, black, and red spheres, respectively.

**Table 1:** Calculated frequencies and (unscaled) intensities of the  $\text{Cu}_2\text{O}_4(\text{CO}_2)^-$  isomers shown in Figure 3 of the main text.

| isomer         | frequency / $\text{cm}^{-1}$ | intensity / $\text{km mol}^{-1}$ | isomer         | frequency / $\text{cm}^{-1}$ | intensity / $\text{km mol}^{-1}$ | isomer         | frequency / $\text{cm}^{-1}$ | intensity / $\text{km mol}^{-1}$ |
|----------------|------------------------------|----------------------------------|----------------|------------------------------|----------------------------------|----------------|------------------------------|----------------------------------|
| <b>2,4,1-a</b> | 1676.27                      | 687.87                           | <b>2,4,1-b</b> | 1696.25                      | 530.51                           | <b>2,4,1-c</b> | 1596.18                      | 724.75                           |
|                | 1202.48                      | 179.67                           |                | 1168.34                      | 32.44                            |                | 1342.10                      | 202.19                           |
|                | 1151.92                      | 452.85                           |                | 1161.71                      | 526.74                           |                | 1056.70                      | 86.96                            |
|                | 998.62                       | 23.30                            |                | 941.69                       | 78.54                            |                | 1031.59                      | 484.47                           |
|                | 809.75                       | 15.42                            |                | 789.49                       | 14.58                            |                | 795.12                       | 20.17                            |
|                | 761.85                       | 11.08                            |                | 715.58                       | 52.66                            |                | 767.47                       | 55.35                            |
|                | 700.16                       | 60.74                            |                | 672.41                       | 57.36                            |                | 693.82                       | 10.79                            |
|                | 631.76                       | 2.072                            |                | 608.97                       | 15.57                            |                | 639.34                       | 3.09                             |
|                | 518.00                       | 21.84                            |                | 561.51                       | 55.93                            |                | 559.19                       | 2.70                             |
|                | 393.28                       | 73.87                            |                | 392.16                       | 4.55                             |                | 539.89                       | 2.98                             |
|                | 348.49                       | 2.49                             |                | 381.88                       | 37.91                            |                | 426.94                       | 14.80                            |
|                | 341.14                       | 6.15                             |                | 314.89                       | 8.88                             |                | 341.33                       | 25.30                            |
|                | 243.19                       | 1.65                             |                | 246.05                       | 20.16                            |                | 274.45                       | 10.78                            |
|                | 206.67                       | 3.05                             |                | 245.42                       | 7.84                             |                | 236.19                       | 6.97                             |
|                | 178.39                       | 12.48                            |                | 170.03                       | 3.84                             |                | 198.50                       | 0.10                             |
|                | 144.59                       | 6.03                             |                | 156.14                       | 6.13                             |                | 182.22                       | 6.81                             |
|                | 93.06                        | 0.09                             |                | 117.63                       | 3.69                             |                | 158.38                       | 1.41                             |
|                | 80.87                        | 3.52                             |                | 107.07                       | 0.02                             |                | 151.99                       | 23.37                            |
|                | 59.12                        | 2.64                             |                | 91.54                        | 1.51                             |                | 99.71                        | 0.01                             |
|                | 45.94                        | 0.84                             |                | 75.14                        | 1.73                             |                | 72.57                        | 3.92                             |
| 28.91          | 1.75                         | 58.51                            | 0.02           | 63.44                        | 2.22                             |                |                              |                                  |
| <b>2,4,1-d</b> | 1625.44                      | 560.76                           |                |                              |                                  |                |                              |                                  |
|                | 1166.77                      | 227.13                           |                |                              |                                  |                |                              |                                  |
|                | 1019.43                      | 60.17                            |                |                              |                                  |                |                              |                                  |
|                | 939.75                       | 305.44                           |                |                              |                                  |                |                              |                                  |
|                | 805.43                       | 11.27                            |                |                              |                                  |                |                              |                                  |
|                | 798.76                       | 118.26                           |                |                              |                                  |                |                              |                                  |
|                | 766.29                       | 0.23                             |                |                              |                                  |                |                              |                                  |
|                | 697.86                       | 1.66                             |                |                              |                                  |                |                              |                                  |
|                | 631.85                       | 68.89                            |                |                              |                                  |                |                              |                                  |
|                | 493.27                       | 15.19                            |                |                              |                                  |                |                              |                                  |
|                | 475.38                       | 18.11                            |                |                              |                                  |                |                              |                                  |
|                | 362.09                       | 14.75                            |                |                              |                                  |                |                              |                                  |
|                | 351.09                       | 7.25                             |                |                              |                                  |                |                              |                                  |
|                | 243.48                       | 8.34                             |                |                              |                                  |                |                              |                                  |
|                | 227.19                       | 0.24                             |                |                              |                                  |                |                              |                                  |
|                | 195.51                       | 11.23                            |                |                              |                                  |                |                              |                                  |
|                | 150.83                       | 0.48                             |                |                              |                                  |                |                              |                                  |
| 134.57         | 1.87                         |                                  |                |                              |                                  |                |                              |                                  |
| 109.88         | 19.77                        |                                  |                |                              |                                  |                |                              |                                  |
| 94.06          | 18.0                         |                                  |                |                              |                                  |                |                              |                                  |
| 76.39          | 4.67                         |                                  |                |                              |                                  |                |                              |                                  |

### S3 Calculated vibrational spectra for $\text{Cu}_3\text{O}_4(\text{CO}_2)^-$ and isolated $\text{CO}_3^{2-}$

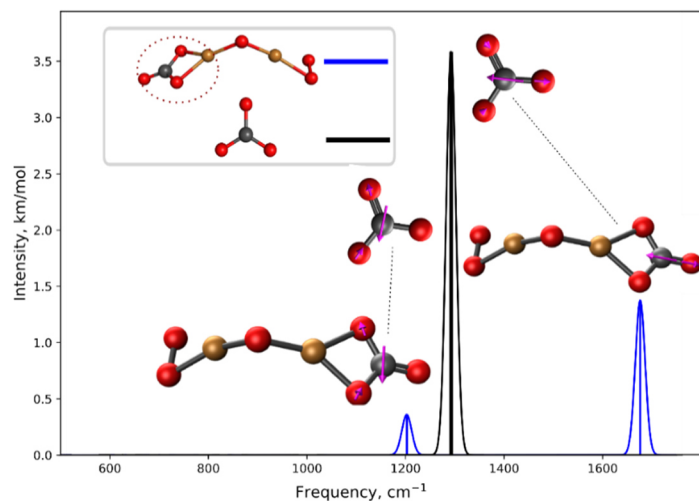

**Figure S3:** DFT calculated harmonic characteristic frequencies of the  $\text{CO}_3$  unit in  $\text{Cu}_2\text{O}_4(\text{CO}_2)^-$  (blue) together with calculated vibrational spectra of an isolated carbonate ion  $\text{CO}_3^{2-}$  (black). Cu, C, and O atoms are depicted as yellow, black, and red spheres, respectively.

## S4 Additional structures and vibrational spectra for $\text{Cu}_3\text{O}_4(\text{CO}_2)^-$

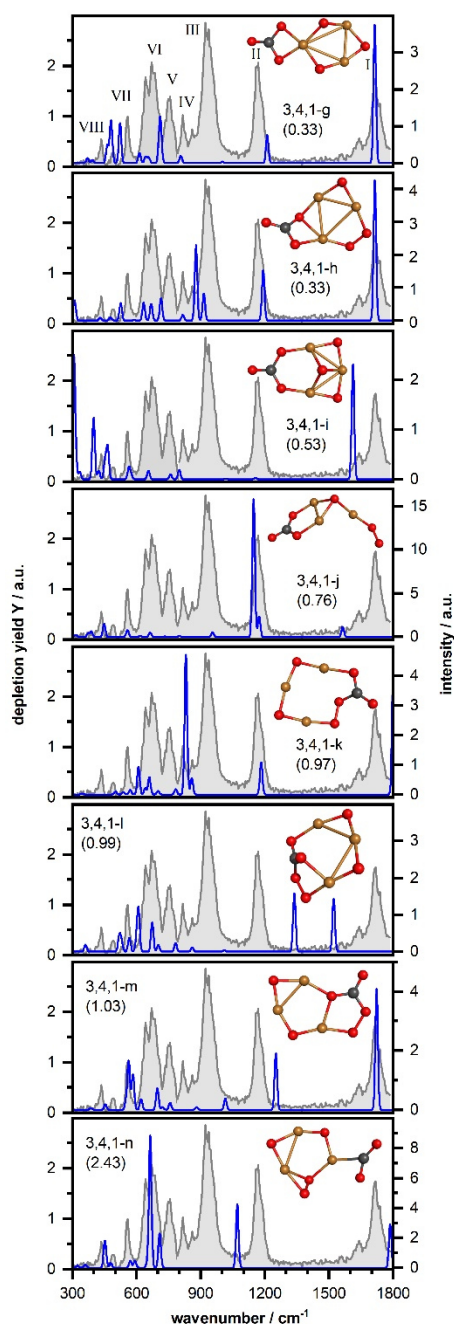

**Figure S4:** IR-MPD spectrum (in gray) of  $\text{Cu}_3\text{O}_4(\text{CO}_2)^-$  together with calculated vibrational spectra (in blue) of several isomeric structures (relative energies are given in brackets in eV). The experimental spectrum was measured in two independent runs ( $1800\text{-}660\text{ cm}^{-1}$  and  $800\text{-}240\text{ cm}^{-1}$ , while the first one was obtained at reduced FELICE fluence). To obtain an intensity match of the peaks in the overlapping spectral region the intensity of the  $800\text{-}240\text{ cm}^{-1}$  spectrum was multiplied by a factor 0.6). The intensities of the calculated spectrum were multiplied by the wavelength. Isomer **3,4,1-h** is similar to isomers **3,4,1-a,b** of the main text; isomer **3,4,1-j** is similar to isomer **3,4,1-e**; isomers **3,4,1-k-m** correspond to the same isomer class as **3,4,1-e**. Isomers **3,4,1-g,i** do not contain an  $\text{O}_2$  unit. While the co-existence of some of these isomers in the molecular beam cannot be completely excluded, none of them provide a superior fit as those discussed in the main text. Cu, C, and O atoms are depicted as yellow, black, and red spheres, respectively.

**Table 2:** Calculated frequencies and (unscaled) intensities of the  $\text{Cu}_3\text{O}_4(\text{CO}_2)^-$  isomers shown in Figure 4 of the main text.

| isomer         | frequency / $\text{cm}^{-1}$ | intensity / $\text{km mol}^{-1}$ | isomer         | frequency / $\text{cm}^{-1}$ | intensity / $\text{km mol}^{-1}$ | isomer         | frequency / $\text{cm}^{-1}$ | intensity / $\text{km mol}^{-1}$ |
|----------------|------------------------------|----------------------------------|----------------|------------------------------|----------------------------------|----------------|------------------------------|----------------------------------|
| <b>3,4,1-a</b> | 1725.88                      | 710.69                           | <b>3,4,1-b</b> | 1722.10                      | 672.85                           | <b>3,4,1-c</b> | 1593.13                      | 201.58                           |
|                | 1197.75                      | 212.25                           |                | 1181.46                      | 124.12                           |                | 1224.81                      | 99.46                            |
|                | 958.52                       | 195.66                           |                | 935.03                       | 470.77                           |                | 1012.25                      | 5.54                             |
|                | 917.83                       | 116.73                           |                | 902.25                       | 66.43                            |                | 841.20                       | 198.01                           |
|                | 813.99                       | 14.93                            |                | 805.23                       | 15.82                            |                | 805.28                       | 13.41                            |
|                | 725.56                       | 50.24                            |                | 701.57                       | 16.50                            |                | 758.57                       | 8.38                             |
|                | 635.49                       | 35.97                            |                | 657.36                       | 41.28                            |                | 676.79                       | 30.50                            |
|                | 626.25                       | 60.69                            |                | 636.32                       | 47.71                            |                | 657.98                       | 33.89                            |
|                | 620.99                       | 1.60                             |                | 585.07                       | 13.38                            |                | 593.46                       | 89.89                            |
|                | 538.71                       | 20.61                            |                | 517.48                       | 26.34                            |                | 512.31                       | 16.72                            |
|                | 478.16                       | 7.95                             |                | 444.55                       | 29.80                            |                | 433.96                       | 8.93                             |
|                | 413.92                       | 15.32                            |                | 391.18                       | 14.39                            |                | 405.68                       | 4.61                             |
|                | 342.97                       | 2.21                             |                | 303.53                       | 9.20                             |                | 339.06                       | 3.17                             |
|                | 282.78                       | 5.12                             |                | 287.98                       | 2.25                             |                | 277.16                       | 8.11                             |
|                | 234.06                       | 0.68                             |                | 255.12                       | 0.49                             |                | 242.08                       | 11.83                            |
|                | 211.48                       | 5.54                             |                | 239.16                       | 4.64                             |                | 219.76                       | 13.54                            |
|                | 199.46                       | 10.65                            |                | 203.40                       | 8.12                             |                | 199.12                       | 3.96                             |
|                | 184.47                       | 3.63                             |                | 180.80                       | 7.29                             |                | 184.70                       | 9.19                             |
|                | 160.83                       | 5.65                             |                | 148.66                       | 4.97                             |                | 153.34                       | 8.30                             |
|                | 124.31                       | 2.77                             |                | 138.60                       | 0.68                             |                | 127.24                       | 3.23                             |
| 118.21         | 3.70                         | 129.99                           | 1.91           | 108.63                       | 1.40                             |                |                              |                                  |
| 96.16          | 3.48                         | 109.82                           | 2.19           | 94.32                        | 2.05                             |                |                              |                                  |
| 78.17          | 2.15                         | 87.11                            | 0.67           | 75.95                        | 0.14                             |                |                              |                                  |
| 59.30          | 2.87                         | 43.61                            | 6.37           | 60.93                        | 4.02                             |                |                              |                                  |
| <b>3,4,1-d</b> | 1738.88                      | 928.05                           | <b>3,4,1-e</b> | 1573.53                      | 208.95                           | <b>3,4,1-f</b> | 1430.85                      | 372.17                           |
|                | 1249.05                      | 128.14                           |                | 1171.73                      | 200.42                           |                | 1333.36                      | 259.36                           |
|                | 924.27                       | 114.39                           |                | 1126.37                      | 1160.57                          |                | 1015.8                       | 12.54                            |
|                | 811.86                       | 2.07                             |                | 960.05                       | 39.25                            |                | 877.13                       | 112.31                           |
|                | 774.08                       | 18.59                            |                | 801.45                       | 10.88                            |                | 830.79                       | 57.24                            |
|                | 718.98                       | 13.35                            |                | 737.08                       | 6.16                             |                | 688.67                       | 26.20                            |
|                | 663.73                       | 38.71                            |                | 673.57                       | 31.79                            |                | 637.41                       | 67.74                            |
|                | 611.02                       | 4.19                             |                | 637.37                       | 2.54                             |                | 622.27                       | 3.08                             |
|                | 588.40                       | 44.94                            |                | 555.36                       | 61.84                            |                | 584.91                       | 53.24                            |
|                | 578.23                       | 26.88                            |                | 488.72                       | 5.47                             |                | 511.41                       | 5.28                             |
|                | 495.94                       | 10.66                            |                | 390.70                       | 23.91                            |                | 443.32                       | 5.03                             |
|                | 447.18                       | 9.33                             |                | 379.85                       | 13.06                            |                | 397.64                       | 1.42                             |
|                | 419.40                       | 10.57                            |                | 321.81                       | 19.49                            |                | 357.61                       | 22.24                            |
|                | 321.05                       | 10.88                            |                | 281.06                       | 2.85                             |                | 286.46                       | 2.56                             |
|                | 263.14                       | 3.80                             |                | 200.53                       | 45.44                            |                | 216.90                       | 6.65                             |
|                | 235.79                       | 21.15                            |                | 176.55                       | 6.65                             |                | 190.17                       | 14.44                            |
|                | 216.95                       | 4.83                             |                | 165.53                       | 7.61                             |                | 167.56                       | 13.12                            |
|                | 186.85                       | 5.87                             |                | 147.00                       | 2.98                             |                | 152.24                       | 4.82                             |
|                | 166.93                       | 1.25                             |                | 145.47                       | 9.91                             |                | 113.92                       | 6.97                             |
|                | 158.11                       | 2.20                             |                | 93.87                        | 0.46                             |                | 92.35                        | 2.46                             |
| 130.60         | 7.53                         | 78.02                            | 18.46          | 86.55                        | 4.32                             |                |                              |                                  |
| 108.05         | 4.56                         | 54.61                            | 1.98           | 79.37                        | 4.20                             |                |                              |                                  |
| 78.21          | 0.31                         | 48.58                            | 3.71           | 73.65                        | 1.42                             |                |                              |                                  |
| 62.22          | 1.91                         | 31.67                            | 4.06           | 46.23                        | 1.36                             |                |                              |                                  |

## S5 Structures and relative energies of anionic $\text{Cu}_2\text{O}_4^-$ and $\text{Cu}_3\text{O}_4^-$ clusters

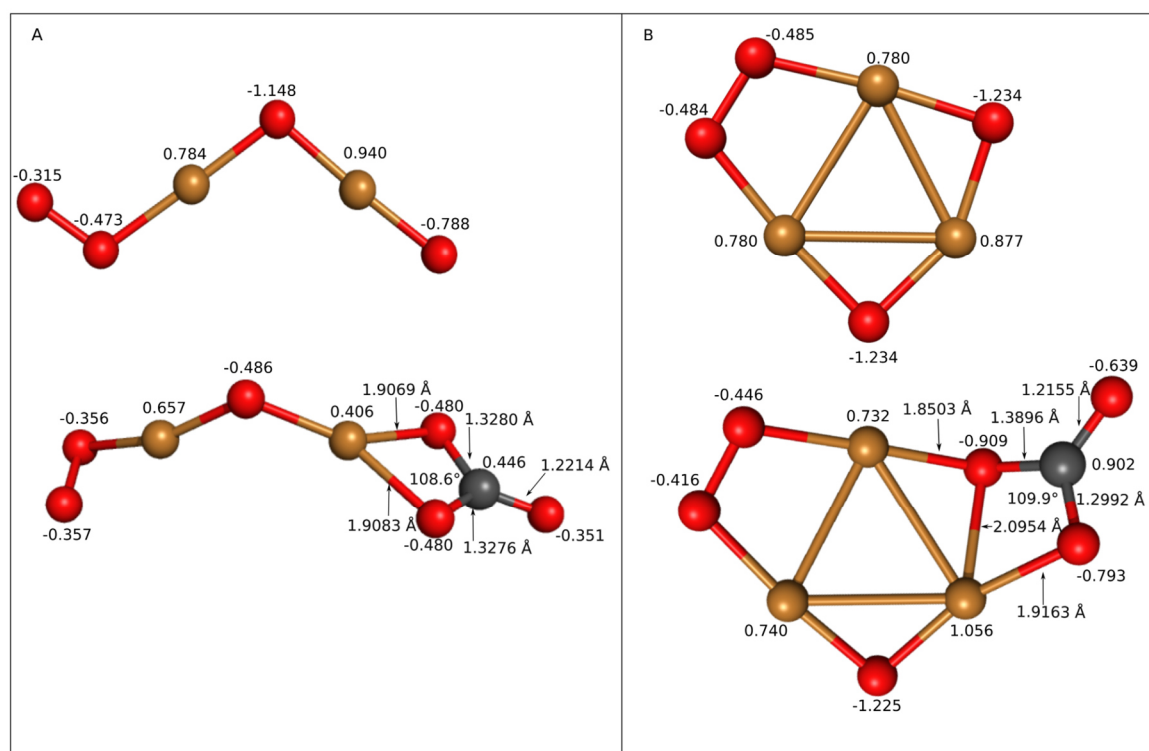

**Figure S5:** Natural atomic charges (e), C-O and O-Cu bond lengths (Å) on the carbonates, and O-C-O angle for the (A) **2,4,1-a** isomer of  $\text{Cu}_2\text{O}_4(\text{CO}_2)^-$  and the **3,4,1-a** isomer of  $\text{Cu}_3\text{O}_4(\text{CO}_2)^-$  (B) as well as their respective bare clusters (top). Cu, C, and O atoms are depicted as yellow, black, and red spheres, respectively.

## S6 XYZ coordinates

### $\text{Cu}_2\text{O}_4^-$

### $\text{Cu}_3\text{O}_4^-$

| 2,4-1                                    | 3,4-1                                       |
|------------------------------------------|---------------------------------------------|
| Cu 1.777073464 0.062893086 0.001998914   | Cu 0.6963040039 -1.2845468863 0.1349027997  |
| Cu -1.037518197 0.151676540 -0.008304471 | Cu -1.6354260762 -0.3286274201 0.0108704248 |
| O 3.154177805 -0.949323325 0.006198118   | Cu 0.3068376905 1.2815319510 -0.0039280752  |
| O 0.419718595 1.158914112 0.002574133    | O 2.3396546852 -0.4294147647 0.0651954742   |
| O -3.681699504 -0.119558065 0.025705414  | O -1.4642293921 1.4510570802 -0.0014679473  |
| O -2.573084741 -0.867847615 -0.011620022 | O 2.1302210385 0.9449038804 -0.0164702291   |
|                                          | O -0.9450975803 -1.9692832536 0.1691095740  |
| SCF energy (Eh) = -3582.036028           | SCF energy (Eh) = -5222.665392              |
| Multiplicity = 2                         | Multiplicity = 3                            |

**Cu<sub>2</sub>O<sub>4</sub>(CO<sub>2</sub>)<sup>-</sup>**

|                                                                                                                                                                                                                                                                                                                                                                                                                                                                                                                                                                                                                                            |                                                                                                                                                                                                                                                                                                                                                                                                                                                                                                                                                                                                                                         |                                                                                                                                                                                                                                                                                                                                                                                                                                                                                                                                                                                                                                         |
|--------------------------------------------------------------------------------------------------------------------------------------------------------------------------------------------------------------------------------------------------------------------------------------------------------------------------------------------------------------------------------------------------------------------------------------------------------------------------------------------------------------------------------------------------------------------------------------------------------------------------------------------|-----------------------------------------------------------------------------------------------------------------------------------------------------------------------------------------------------------------------------------------------------------------------------------------------------------------------------------------------------------------------------------------------------------------------------------------------------------------------------------------------------------------------------------------------------------------------------------------------------------------------------------------|-----------------------------------------------------------------------------------------------------------------------------------------------------------------------------------------------------------------------------------------------------------------------------------------------------------------------------------------------------------------------------------------------------------------------------------------------------------------------------------------------------------------------------------------------------------------------------------------------------------------------------------------|
| <p><b>2,4,1-a</b></p> <p>Cu 2.070549369 0.149988126 0.001840883<br/>           Cu -1.019037234 0.405136079 0.028897802<br/>           O 0.626741811 1.112102747 0.064315256<br/>           O 3.659472803 -0.822528519 0.621077173<br/>           O 3.641419373 -0.800282021 -0.709239715<br/>           O -2.475716876 -0.257788697 1.065597002<br/>           C -3.211992239 -0.431709873 -0.025788207<br/>           O -2.505050598 -0.044481774 -1.080640598<br/>           O -4.349603824 -0.875564577 -0.053195695<br/>           SCF energy (Eh) = -3770,759571 (M=2)</p>                                                            | <p><b>2,4,1-b</b></p> <p>Cu 1.235004827 -0.008461059 -0.000718381<br/>           Cu -1.033175076 1.069126945 0.002014875<br/>           O 0.615565780 1.720481505 0.004089456<br/>           O 3.236534867 -0.251845038 -0.009049471<br/>           O 2.610421048 -1.416823645 0.004280466<br/>           O -2.623923098 0.053097452 -0.012954265<br/>           C -1.978260501 -1.091351295 -0.001207358<br/>           O -2.464137518 -2.208644577 0.001790755<br/>           O -0.622398551 -0.922666062 0.008048788<br/>           SCF energy (Eh) = -3770,745533 (M=2)<br/>           SCF energy (Eh) = -3770.7385576957 (M=4)</p> | <p><b>2,4,1-c</b></p> <p>Cu 2.812908679 0.036066516 -0.000449585<br/>           Cu -2.044671299 0.050437419 0.002550500<br/>           O -0.221923032 0.594111115 -0.015868803<br/>           O 1.304681358 -1.085506280 -0.008957150<br/>           O 4.267495255 0.992473120 0.013192469<br/>           O -3.874400447 -0.075299203 0.011674518<br/>           C 0.121268784 -0.667523194 -0.006747627<br/>           O -0.908190227 -1.472908008 0.004835744<br/>           O -3.443474998 1.234194890 -0.007431877<br/>           SCF energy (Eh) = -3770,743935 (M=2)<br/>           SCF energy (Eh) = -3770.73178035441 (M=4)</p> |
| <p><b>2,4,1-d</b></p> <p>Cu -0.217977662 -1.198449658 -0.011845321<br/>           Cu -0.210751310 1.198681987 0.012337820<br/>           O 1.606292257 -1.151070122 0.017012547<br/>           O -2.772034735 0.004250957 0.000620036<br/>           O -2.059693950 1.179041049 -0.025517997<br/>           O 1.613927775 1.150574716 -0.022147502<br/>           C 2.286543745 -0.002371542 -0.000385333<br/>           O 3.517063234 -0.006625476 0.003092994<br/>           O -2.066319865 -1.175234656 0.025443612<br/>           SCF energy (Eh) = -3770,739200 (M=2)</p>                                                             | <p><b>2,4,1-e</b></p> <p>Cu -1.192598656 0.000598902 -0.002387689<br/>           Cu 2.306230411 -0.002281762 -0.000440255<br/>           O 0.579919294 -0.005627382 -0.002556487<br/>           O -2.759572841 -1.079270657 0.007724957<br/>           O -2.758757386 1.080191000 -0.006382610<br/>           O 4.152039347 0.670754379 0.014256989<br/>           C -3.533718416 0.000866600 0.002318047<br/>           O -4.754864271 0.001301125 0.004004848<br/>           O 4.154609556 -0.661898046 -0.008534937<br/>           SCF energy (Eh) = -3770,757954 (M=2)</p>                                                          | <p><b>2,4,1-f</b></p> <p>Cu 1.191544768 0.005480761 0.003237425<br/>           Cu -2.312690812 0.007139963 -0.007726376<br/>           O -0.588338681 0.021302685 -0.007056229<br/>           O 2.780737635 1.080000281 -0.032106405<br/>           O 2.767822525 -1.087876212 0.043778127<br/>           O -4.156940524 0.044095418 0.671216766<br/>           C 3.544087942 -0.008463165 0.000496185<br/>           O 4.766399832 -0.015810714 -0.008241670<br/>           O -4.163592335 -0.081114209 -0.651690279<br/>           SCF energy (Eh) = -3770,750652 (M=4)</p>                                                           |
| <p><b>2,4,1-g</b></p> <p>Cu 1.147326403 -0.079695991 -0.054783764<br/>           Cu -1.118280688 1.240131326 0.138224136<br/>           O -0.342763128 -1.266308786 -0.035154671<br/>           O 2.590384061 -1.245389187 0.181213128<br/>           O 2.997395298 0.046871747 0.062334015<br/>           O -2.310094688 -0.102262022 -0.064644935<br/>           C -1.659814821 -1.281471946 -0.046150837<br/>           O -2.296515275 -2.330022738 -0.042667899<br/>           O 0.501164132 1.651636858 -0.368937856<br/>           SCF energy (Eh) = -3770,740791 (M=2)<br/>           SCF energy (Eh) = -3770.73359106221 (M=4)</p> | <p><b>2,4,1-h</b></p> <p>Cu 1.036859449 0.374002410 0.256104262<br/>           Cu -1.339657002 1.024298263 -0.257362404<br/>           O 0.026448643 1.929432145 0.366350203<br/>           O 3.194491387 -0.916318843 -0.884731701<br/>           O 2.764030520 -0.358726997 0.193413024<br/>           O -2.185021465 -0.588329582 -0.216033695<br/>           C -1.314346250 -1.554065291 0.088474665<br/>           O -0.041931124 -1.242362099 0.298421213<br/>           O -1.674617141 -2.726985593 0.180785720<br/>           SCF energy (Eh) = -3770,729289 (M=2)</p>                                                          | <p><b>2,4,1-i</b></p> <p>Cu 1.585099796 -0.023361157 0.001729449<br/>           Cu -1.140460376 0.260223833 0.006525892<br/>           O 0.057282370 -1.146065861 0.034186314<br/>           O 3.385431287 -0.996990162 -0.020924094<br/>           O 3.653021152 0.386630009 0.014000515<br/>           O 0.398049363 1.473876033 -0.047717345<br/>           O -3.071618815 0.968529987 0.029547364<br/>           C -3.045774484 -0.312355254 -0.003365813<br/>           O -3.749652393 -1.310340766 -0.036494008<br/>           SCF energy (Eh) = -3770.67274999 (M=2)</p>                                                         |

**Cu<sub>3</sub>O<sub>4</sub>(CO<sub>2</sub>)<sup>-</sup>**

|                                                                                                                                                                                                                                                                                                                                                                                                                                                                                                                                                                                                                                                                                           |                                                                                                                                                                                                                                                                                                                                                                                                                                                                                                                                                                                                                                                                                          |                                                                                                                                                                                                                                                                                                                                                                                                                                                                                                                                                                                                                                                                                             |
|-------------------------------------------------------------------------------------------------------------------------------------------------------------------------------------------------------------------------------------------------------------------------------------------------------------------------------------------------------------------------------------------------------------------------------------------------------------------------------------------------------------------------------------------------------------------------------------------------------------------------------------------------------------------------------------------|------------------------------------------------------------------------------------------------------------------------------------------------------------------------------------------------------------------------------------------------------------------------------------------------------------------------------------------------------------------------------------------------------------------------------------------------------------------------------------------------------------------------------------------------------------------------------------------------------------------------------------------------------------------------------------------|---------------------------------------------------------------------------------------------------------------------------------------------------------------------------------------------------------------------------------------------------------------------------------------------------------------------------------------------------------------------------------------------------------------------------------------------------------------------------------------------------------------------------------------------------------------------------------------------------------------------------------------------------------------------------------------------|
| <p><b>3,4,1-a</b></p> <p>Cu 0.148143263 -1.299935880 -0.181464177<br/>           Cu -0.783936637 1.214224254 -0.030091689<br/>           Cu 1.781500756 0.679290417 0.048295117<br/>           O 2.718578124 -0.881952063 0.356896753<br/>           O -2.503709052 0.753634322 0.678841953<br/>           O 1.835870805 -1.936925471 0.287641820<br/>           O -1.499161093 -0.637187343 -0.701887374<br/>           C -2.600971335 -0.412611239 0.114520175<br/>           O -3.504627169 -1.221215195 0.197582817<br/>           O 0.750587623 2.081381062 -0.313145883<br/>           SCF energy (Eh) = -5411.375208 (M=3)<br/>           SCF energy (Eh) = -5411,353506 (M=1)</p> | <p><b>3,4,1-b</b></p> <p>Cu 0.090543012 -1.515699033 0.059188937<br/>           Cu -1.933282045 -0.114859706 -0.113175265<br/>           Cu 0.432781543 0.930654536 0.197190740<br/>           O 3.751976304 -0.423391696 -0.348644044<br/>           O -2.101546932 1.709462041 -0.072361901<br/>           O 1.654141187 -0.582236224 0.508502172<br/>           O -1.650382433 -1.862832009 -0.174557545<br/>           C 2.681516307 0.106023766 -0.124764806<br/>           O 2.308685964 1.327370726 -0.358268674<br/>           O -0.862915419 2.289262071 0.019787600<br/>           SCF energy (Eh) = -5411.366843 (M=3)<br/>           SCF energy (Eh) = -5411,353208(M=1)</p> | <p><b>3,4,1-c</b></p> <p>Cu 1.911920630 0.381037866 0.102697874<br/>           Cu -0.497046324 1.341797209 -0.044477185<br/>           Cu -0.092166988 -1.205443399 -0.154362344<br/>           O 2.435175584 -1.349567424 0.618536733<br/>           O -1.846004212 -1.251888650 0.276075559<br/>           O 1.696338489 -1.459664400 -0.640345354<br/>           O 1.179372019 1.982212742 -0.047364115<br/>           C -2.734968864 -0.279379410 0.111480416<br/>           O -2.270722079 0.924165895 -0.144524241<br/>           O -3.937747179 -0.511268431 0.202524602<br/>           SCF energy (Eh) = -5411.365077 (M=3)<br/>           SCF energy (Eh) = -5411,358944 (M=1)</p> |
|-------------------------------------------------------------------------------------------------------------------------------------------------------------------------------------------------------------------------------------------------------------------------------------------------------------------------------------------------------------------------------------------------------------------------------------------------------------------------------------------------------------------------------------------------------------------------------------------------------------------------------------------------------------------------------------------|------------------------------------------------------------------------------------------------------------------------------------------------------------------------------------------------------------------------------------------------------------------------------------------------------------------------------------------------------------------------------------------------------------------------------------------------------------------------------------------------------------------------------------------------------------------------------------------------------------------------------------------------------------------------------------------|---------------------------------------------------------------------------------------------------------------------------------------------------------------------------------------------------------------------------------------------------------------------------------------------------------------------------------------------------------------------------------------------------------------------------------------------------------------------------------------------------------------------------------------------------------------------------------------------------------------------------------------------------------------------------------------------|



|                                                                                                                                                                                                                                                                                                                                                                                                                                                                                                                                                                                |                                                                                                                                                                                                                                                                                                                                                                                                                                                                                                                                                                             |                                                                                                                                                                                                                                                                                                                                                                                                                                                                                                                                                                               |
|--------------------------------------------------------------------------------------------------------------------------------------------------------------------------------------------------------------------------------------------------------------------------------------------------------------------------------------------------------------------------------------------------------------------------------------------------------------------------------------------------------------------------------------------------------------------------------|-----------------------------------------------------------------------------------------------------------------------------------------------------------------------------------------------------------------------------------------------------------------------------------------------------------------------------------------------------------------------------------------------------------------------------------------------------------------------------------------------------------------------------------------------------------------------------|-------------------------------------------------------------------------------------------------------------------------------------------------------------------------------------------------------------------------------------------------------------------------------------------------------------------------------------------------------------------------------------------------------------------------------------------------------------------------------------------------------------------------------------------------------------------------------|
| <p><b>3,4,1-d</b></p> <p>Cu 0.447171484 -1.117032267 -0.159246899<br/> Cu -2.172956307 -0.391917314 0.146753694<br/> Cu -0.548623970 1.336288624 -0.065838218<br/> O 2.270002932 1.097105480 -0.395777574<br/> O -2.237704542 1.342763604 0.594579230<br/> O 0.959486851 0.704425077 -0.963292065<br/> O -1.201969853 -1.824591468 -0.224501120<br/> C 2.902403768 0.048412010 0.270705518<br/> O 2.250797953 -1.047810525 0.411842614<br/> O 4.027315709 0.317694795 0.658071188<br/> SCF energy (Eh) = -5411.350063 (M=3)<br/> SCF energy (Eh) = -5411,333856 (M=1)</p>      | <p><b>3,4,1-e</b></p> <p>Cu -0.787230604 -1.317891166 0.027735738<br/> Cu -0.483259881 0.783315581 0.717374715<br/> Cu 1.941993187 0.062792327 0.051480301<br/> O 0.660967677 -0.681433829 1.085995186<br/> O -2.089461887 1.365826402 0.003473405<br/> O 3.293598276 0.859205076 -0.924706950<br/> O -2.431435631 -0.819856477 -0.645576044<br/> C -2.845915203 0.447984399 -0.586043161<br/> O -3.933264311 0.753155321 -1.075885009<br/> O 4.199834985 -0.102670480 -0.891409698<br/> SCF energy (Eh) = -5411.349559 (M=3)<br/> SCF energy (Eh) = -5411,336083 (M=1)</p> | <p><b>3,4,1-f</b></p> <p>Cu 1.384870935 0.992903245 0.000250677<br/> Cu -1.262060131 1.222652741 -0.073723878<br/> Cu 0.410871732 -1.648005220 -0.096615713<br/> O 2.055092504 -0.915254514 -0.538544110<br/> O -1.575884607 -0.216512200 1.278860716<br/> O -1.431745183 -2.113836939 0.052051180<br/> O 0.145651737 2.302679560 -0.122890419<br/> C -1.845460628 -0.897190092 0.197709126<br/> O -2.430217787 -0.231780017 -0.749300267<br/> O 2.686599611 -0.209774848 0.548113371<br/> SCF energy (Eh) = -5411.344794 (M=3)<br/> SCF energy (Eh) = -5411,334852 (M=1)</p> |
| <p><b>3,4,1-g</b></p> <p>Cu 1.573204764 1.122945363 0.117808079<br/> Cu -1.001528477 0.090938481 -0.316757792<br/> Cu 1.764411659 -1.218898206 0.130879362<br/> O -2.394174612 -1.135288643 -0.027596678<br/> O 0.271306138 -1.171886838 -0.810732650<br/> O 2.978218129 0.094979532 0.525671515<br/> O 0.020053086 1.617232446 -0.518436161<br/> C -3.216526856 -0.149752591 0.304533306<br/> O -4.381813756 -0.270188058 0.633027139<br/> O -2.549512644 0.995643069 0.216421876<br/> SCF energy (Eh) = -5411.362964 (M=3)<br/> SCF energy (Eh) = -5411,34261 (M=1)</p>      | <p><b>3,4,1-h</b></p> <p>Cu -0.512734409 -1.238592271 -0.107771034<br/> Cu -0.160328964 1.419818694 -0.202313394<br/> Cu 1.977655618 0.282217529 0.176793555<br/> O 1.083043730 -2.138600394 -0.351725905<br/> O 1.456368816 1.972324986 0.337290871<br/> O 2.262561741 -1.518076281 0.070857382<br/> O -1.642860069 0.458078872 -0.715756398<br/> C -2.623478374 0.021983861 0.161496477<br/> O -2.244623474 -1.085855663 0.726982489<br/> O -3.676028850 0.615656257 0.294408620<br/> SCF energy (Eh) = -5411.362938 (M=3)<br/> SCF energy (Eh) = -5411,341266 (M=1)</p>  | <p><b>3,4,1-i</b></p> <p>Cu 1.912408770 -0.000646930 -0.228404311<br/> Cu -0.139911755 1.410074306 0.102014693<br/> Cu -0.142559429 -1.410909052 0.101641992<br/> O -1.950794785 -1.141181688 0.003260096<br/> O 0.494049410 -0.000590361 1.209375112<br/> O 1.622319459 -1.785543458 -0.280252733<br/> O 1.624665712 1.785922674 -0.277812149<br/> C -2.604044455 0.001251580 -0.160328567<br/> O -1.946192218 1.141635654 0.000054519<br/> O -3.799537988 0.004189570 -0.444668276<br/> SCF energy (Eh) = -5411.355750 (M=3)<br/> SCF energy (Eh) = -5411,346655 (M=1)</p>  |
| <p><b>3,4,1-j</b></p> <p>Cu -0.837070635 1.278782155 -0.252806745<br/> Cu -0.433876041 -0.560347068 0.942864391<br/> Cu 1.928155663 0.282060750 0.017488159<br/> O 3.806768684 -1.591184725 -0.762542846<br/> O 0.590755856 1.033429077 0.983843470<br/> O 3.374085914 -0.367093233 -0.912854723<br/> O -1.935036518 -1.422053939 0.303671462<br/> C -2.731029565 -0.731576981 -0.506528340<br/> O -2.380865717 0.490813426 -0.897989702<br/> O -3.789818621 -1.222025280 -0.899084951<br/> SCF energy (Eh) = -5411.347217 (M=3)<br/> SCF energy (Eh) = -5411,322584 (M=1)</p> | <p><b>3,4,1-k</b></p> <p>Cu -0.876667915 -1.660334374 0.095042684<br/> Cu -1.768798492 0.723722146 -0.144393937<br/> Cu 0.768935195 1.517543389 0.087937906<br/> O 1.397025782 -0.775186940 0.599283721<br/> O -0.866088096 2.208221126 0.217716358<br/> O 2.546595117 0.919066256 -0.139413738<br/> O -2.423811870 -0.925996555 -0.355404587<br/> C 2.557171231 -0.375163003 -0.132254124<br/> O 3.346827147 -1.162231840 -0.588572332<br/> O 0.883999137 -2.088375253 0.225704553<br/> SCF energy (Eh) = -5411.339581 (M=3)<br/> SCF energy (Eh) = -5411,319968 (M=1)</p> | <p><b>3,4,1-l</b></p> <p>Cu 1.489204509 -1.191613127 0.011544882<br/> Cu 1.163273664 1.352633715 0.081825367<br/> Cu -1.532378496 0.898417275 -0.042824597<br/> O -2.775290473 -0.421544177 0.518774238<br/> O -0.359354059 2.240607859 -0.161056845<br/> O -0.874083644 -0.658442614 -1.143604153<br/> O 2.538671376 0.242273910 0.285379418<br/> C -0.910260729 -1.571388042 -0.266860335<br/> O -1.923186386 -1.627169128 0.607457872<br/> O 0.015577405 -2.437647076 -0.090033268<br/> SCF energy (Eh) = -5411.338838 (M=3)<br/> SCF energy (Eh) = -5411,321741 (M=1)</p> |
| <p><b>3,4,1-m</b></p> <p>Cu 0.651327361 -1.321320041 -0.001290297<br/> Cu -2.085886796 -0.470007865 0.003315183<br/> Cu -0.683045774 1.429862915 -0.002013984<br/> O 2.512005505 -1.418100770 -0.002450649<br/> O -2.507354305 1.268117251 -0.003847630<br/> O 1.040847551 0.653135825 -0.002868114<br/> O -1.051817658 -1.898545676 0.000653565<br/> C 2.319572479 0.961418529 0.001751862<br/> O 3.154047761 -0.099026367 0.000804453<br/> O 2.788910671 2.083666430 0.006354955<br/> SCF energy (Eh) = -5411.337455 (M=3)<br/> SCF energy (Eh) = -5411,333901(M=1)</p>      | <p><b>3,4,1-n</b></p> <p>Cu 1.173133532 -0.149433882 -0.370114381<br/> Cu -1.087293425 1.537423803 0.057610757<br/> Cu -1.796539097 -0.895482425 0.201257328<br/> O -0.503099374 -2.303607301 0.441183566<br/> O -2.701919030 0.667961960 0.212397574<br/> O -0.241655298 -1.539804186 -0.853799711<br/> O 0.617826041 1.605318849 -0.545337004<br/> C 3.073719195 0.039075425 0.355751857<br/> O 2.954221582 -1.196937566 0.131915354<br/> O 3.770620526 0.952421999 0.750094150<br/> SCF energy (Eh) = -5411.28606312 (M=3)</p>                                           |                                                                                                                                                                                                                                                                                                                                                                                                                                                                                                                                                                               |

## S7 References

[34]

M. J. Frisch, G. W. Trucks, H. B. Schlegel, G. E. Scuseria, M. A. Robb, J. R. Cheeseman, G. Scalmani, V. Barone, G. A. Petersson, H. Nakatsuji, X. Li, M. Caricato, A. V. Marenich, J. Bloino, B. G. Janesko, R. Gomperts, B. Mennucci, H. P. Hratchian, J. V. Ortiz, A. F. Izmaylov, J. L. Sonnenberg, Williams, F. Ding, F. Lipparini, F. Egidi, J. Goings, B. Peng, A. Petrone, T. Henderson, D. Ranasinghe, V. G. Zakrzewski, J. Gao, N. Rega, G. Zheng, W. Liang, M. Hada, M. Ehara, K. Toyota, R. Fukuda, J. Hasegawa, M. Ishida, T. Nakajima, Y. Honda, O. Kitao, H. Nakai, T. Vreven, K. Throssell, J. A. Montgomery Jr., J. E. Peralta, F. Ogliaro, M. J. Bearpark, J. J. Heyd, E. N. Brothers, K. N. Kudin, V. N. Staroverov, T. A. Keith, R. Kobayashi, J. Normand, K. Raghavachari, A. P. Rendell, J. C. Burant, S. S. Iyengar, J. Tomasi, M. Cossi, J. M. Millam, M. Klene, C. Adamo, R. Cammi, J. W. Ochterski, R. L. Martin, K. Morokuma, O. Farkas, J. B. Foresman, Gaussian 16 Rev. B.01, **2016**.

[35]

E. Epifanovsky, A. T. B. Gilbert, X. Feng, J. Lee, Y. Mao, N. Mardirossian, P. Pokhilko, A. F. White, M. P. Coons, A. L. Dempwolff, Z. Gan, D. Hait, P. R. Horn, L. D. Jacobson, I. Kaliman, J. Kussmann, A. W. Lange, K. U. Lao, D. S. Levine, J. Liu, S. C. McKenzie, A. F. Morrison, K. D. Nanda, F. Plasser, D. R. Rehn, M. L. Vidal, Z.-Q. You, Y. Zhu, B. Alam, B. J. Albrecht, A. Aldossary, E. Alguire, J. H. Andersen, V. Athavale, D. Barton, K. Begam, A. Behn, N. Bellonzi, Y. A. Bernard, E. J. Berquist, H. G. A. Burton, A. Carreras, K. Carter-Fenk, R. Chakraborty, A. D. Chien, K. D. Closser, V. Cofer-Shabica, S. Dasgupta, M. de Wergifosse, J. Deng, M. Diedenhofen, H. Do, S. Ehlert, P.-T. Fang, S. Fatehi, Q. Feng, T. Friedhoff, J. Gayvert, Q. Ge, G. Gidofalvi, M. Goldey, J. Gomes, C. E. González-Espinoza, S. Gulania, A. O. Gunina, M. W. D. Hanson-Heine, P. H. P. Harbach, A. Hauser, M. F. Herbst, M. Hernández Vera, M. Hodecker, Z. C. Holden, S. Houck, X. Huang, K. Hui, B. C. Huynh, M. Ivanov, Á. Jász, H. Ji, H. Jiang, B. Kaduk, S. Kähler, K. Khistyayev, J. Kim, G. Kis, P. Klunzinger, Z. Koczor-Benda, J. H. Koh, D. Kosenkov, L. Koulias, T. Kowalczyk, C. M. Krauter, K. Kue, A. Kunitsa, T. Kus, I. Ladjánszki, A. Landau, K. V. Lawler, D. Lefrancois, S. Lehtola, R. R. Li, Y.-P. Li, J. Liang, M. Liebenthal, H.-H. Lin, Y.-S. Lin, F. Liu, K.-Y. Liu, M. Loipersberger, A. Luenser, A. Manjanath, P. Manohar, E. Mansoor, S. F. Manzer, S.-P. Mao, A. V. Marenich, T. Markovich, S. Mason, S. A. Maurer, P. F. McLaughlin, M. F. S. J. Menger, J.-M. Mewes, S. A. Mewes, P. Morgante, J. W. Mullinax, K. J. Oosterbaan, G. Paran, A. C. Paul, S. K. Paul, F. Pavošević, Z. Pei, S. Prager, E. I. Proynov, Á. Rák, E. Ramos-Cordoba, B. Rana, A. E. Rask, A. Rettig, R. M. Richard, F. Rob, E. Rossomme, T. Scheele, M. Scheurer, M. Schneider, N. Sergueev, S. M. Sharada, W. Skomorowski, D. W. Small, C. J. Stein, Y.-C. Su, E. J. Sundstrom, Z. Tao, J. Thirman, G. J. Tornai, T. Tsuchimochi, N. M. Tubman, S. P. Veccham, O. Vydrov, J. Wenzel, J. Witte, A. Yamada, K. Yao, S. Yeganeh, S. R. Yost, A. Zech, I. Y. Zhang, X. Zhang, Y. Zhang, D. Zuev, A. Aspuru-Guzik, A. T. Bell, N. A. Besley, K. B. Bravaya, B. R. Brooks, D. Casanova, J.-D. Chai, S. Coriani, C. J. Cramer, G. Cserey, A. E. DePrince, R. A. DiStasio, A. Dreuw, B. D. Dunietz, T. R. Furlani, W. A. Goddard, S. Hammes-Schiffer, T. Head-Gordon, W. J. Hehre, C.-P. Hsu, T.-C. Jagau, Y. Jung, A. Klamt, J. Kong, D. S. Lambrecht, W. Liang, N. J. Mayhall, C. W. McCurdy, J. B. Neaton, C. Ochsenfeld, J. A. Parkhill, R. Peverati, V. A. Rassolov, Y. Shao, L. V. Slipchenko, T. Stauch, R. P. Steele, J. E. Subotnik, A. J. W. Thom, A. Tkatchenko, D. G. Truhlar, T. Van Voorhis, T. A. Wesolowski, K. B. Whaley, H. L. Woodcock, P. M. Zimmerman, S. Faraji, P. M. W. Gill, M. Head-Gordon, J. M. Herbert, A. I. Krylov, *J. Chem. Phys.* **2021**, *155*, 084801.
